# Supplementary material for: Longitudinal within-host evolution of HIV Nef-mediated CD4, HLA and SERINC5 downregulation activity: a case study
Source: Retrovirology. 2020 Jan 9;17:3. doi: 10.1186/s12977-019-0510-1 (PMC6953280; doi:10.1186/s12977-019-0510-1)
Supplement: Supplementary file 1 — Additional file 1: Nef sequences and related functional data. [file 12977_2019_510_MOESM1_ESM.xlsx]

## Sheet: ID_function_seq
clone number	cloneID	GenBankID	mean CD4 downregulation	mean HLA downregulation	mean SERINC5 downregulation	nucleotide sequence (aligned)	amino acid sequence (aligned)
1	1996_1	MG822964	99.8994	90.9941	91.7687	ATGGGTGGCAAGTGGTCAAAAAGTAAGGCGGGTGGATGGCCTGCTATAAGGGAAAGAATGCAACAAGCTGAGCCAGCAGCAGAAGGGGTGGGAGCAGTATCTCGAGACCTAGAAAAACATGGAGCGATCACAAGTAGCAATATAAATAATGCTGCTTGTACCTGGCTAGAAGCGCAAGCACAAGAGGAGGAAGAGGTGGGTTTTCCAGTCAGACCTCAGGTACCTTTAAGACCAATGACTTACAAGGGAGCTTTTGATCTTAGCTTCTTTTTAAAAGAAAAGGGGGGACTGGAAGGGCTAATTTGGTCCCAAAAAAGACAAGACATCCTTGATTTGTGGGTCTACAATACACAAGGCTACTTCCCTGATTGGAATAACTACACACCAGGGCCAGGGGTC…	MGGKWSKSKAGGWPAIRERMQQAEPAAEGVGAVSRDLEKHGAITSSNINNAACTWLEAQAQEEEEVGFPVRPQVPLRPMTYKGAFDLSFFLKEKGGLEGLIWSQKRQDILDLWVYNTQGYFPDWNNYTPGPGVRYPLTFGWCFKLVPVEPDKVEEATEGENNSLLHPICQHGMDDPEKEVLVWKFDSRLAYHHMAKEKHPEFYKDC*
2	1996_2	MG822977	100.805	93.8646	94.4049	ATGGGTGGCAAGTGGTCAAAAAGTAAGGCGGGTGGATGGCCTGCTATAAGGGAAAGAATGCAACAAGCTGAGCCAGCAGCAGAAGGGGTGGGAGCAGTATCTCGAGACCTAGAAAAACATGGAGCGATCACAAGTAGCAATATAAATAATGCTGCTTGTACCTGGCTAGAAGCACAAGCACAAGAGGAGGAAGAGGTGGGTTTTCCAGTCAGACCTCAGGTACCTTTAAGACCAATGACTTACAAGGGAGCTTTTGATCTTAGCTTCTTTTTAAAAGAAAAGGGGGGACTGGAAGGGCTAATTTGGTCCCAAAAAAGACAAGACATCCTTGATTTGTGGGTCTACAACACACAAGGCTACTTCCCTGATTGGCATAACTACACACCAGGGCCAGGGATC…	MGGKWSKSKAGGWPAIRERMQQAEPAAEGVGAVSRDLEKHGAITSSNINNAACTWLEAQAQEEEEVGFPVRPQVPLRPMTYKGAFDLSFFLKEKGGLEGLIWSQKRQDILDLWVYNTQGYFPDWHNYTPGPGIRYPLTFGWCFKLVPVEPDKVEEATEGENNSLLHPICQHGMDDPEKEVLVWKFDSRLAYHHMAREKHPEFYKDC*
3	1996_3	MG822952	101.124	97.9282	99.2412	ATGGGTAGCAAGTGGTCAAAAAGTAAGGCGGGTGGATGGCCTGCTATAAGGGAAAAAATGCAACAAGCTGAACCAGCAGCAGAAGGGGTGGGAGCAGTATCTCGAGACCTAGAAAAACATGGAGCGATCACAAGTAGCAATATAAATAATGCTGCTTGTACCTGGCTAGAAGCACAAGCACAAGAGGAGGAAGAGGTGGGTTTTCCGGTCAGACCTCAGGTACCTTTAAGACCAATGACTTACAAGGGAGCTTTTGATCTTAGCTTCTTTTTAAAAGAAAAGGGGGGACTGGAAGGGCTAATTTGGTCCCAAAAAAGACAAGACATCCTTGATTTGTGGGTCTACAACACACAAGGCTACTTCCCTGATTGGCATAACTACACACCAGGGCCAGGGGTC…	MGSKWSKSKAGGWPAIREKMQQAEPAAEGVGAVSRDLEKHGAITSSNINNAACTWLEAQAQEEEEVGFPVRPQVPLRPMTYKGAFDLSFFLKEKGGLEGLIWSQKRQDILDLWVYNTQGYFPDWHNYTPGPGVRYPLTFGWCFKLVPVEPDKVEEATEGENNSLLHPICQHGMDDPEKEVLVWKFDSRLAYHHMAREKHPEFYKDC*
4	1997_1	MG822971	100.717	93.0206	94.2867	ATGGGTGGCAAGTGGTCAAAAAGTAAGGCGGGTGGATGGCCTGCTATAAGGGAAAGAATGCAACAAGCTGAGCCAGCAGCAGAAGGGGTGGGAGCAGTATCTCGAGACCTAGAAAAACATGGAGCGATCACAAGTAGCAATATAGATAATGCTGCTTGTACCTGGCTAGAAGCACAAGCACAAGAGGAGGAAGAGGTGGGTTTTCCAGTCAGACCTCAGGTACCTTTAAGACCAATGACTTACAAAGGAGCTTTTGATCTTAGCTTCTTTTTAAAAGAAAAGGGGGGACTGGAAGGGCTAATTTGGTCCCAAAAAAGACAAGACATCCTTGATTTGTGGGTCTACAACACACAAGGCTACTTCCCTGATTGGCATAACTACACACCAGGGCCAGGGGTC…	MGGKWSKSKAGGWPAIRERMQQAEPAAEGVGAVSRDLEKHGAITSSNIDNAACTWLEAQAQEEEEVGFPVRPQVPLRPMTYKGAFDLSFFLKEKGGLEGLIWSQKRQDILDLWVYNTQGYFPDWHNYTPGPGVRYPLTFGWCFKLVPVEPDKVEEATEGENNSLLHPICQHGMDDPEKEVLVWKFDSRLAYHHMAKEKHPEFYKDC*
5	1997_2	MG822959	99.9875	71.0339	93.4321	ATGGGTGGCAAGTGGTCAAAAAGTAAGGCGGGTGGATGGCCTGCTATAAGGGAAAGAATGCAACAAGCTGAGCCAGCAGCAGAAGGAGTGGGAGCAGTATCTCGAGACCTAGAAAAACATGGAGCGATCACAAGTAGCAATATAAATAATGCTGCTTGTACCTGGCTAGAAGCACAAGCACAAGAGGAGGAAGAGGTGGGTTTTCCAGTCAGACCTCAGGTACCTTTAAGACCAATGACTTACAAGGGAGCTTTTGATCTTAGCTTCTTTTTAAAAGAAAAGGGGGGACTGGAAGGGCTAATTTGGTCCCAAAAAAGACAAGACATCCTTGATTTGTGGGTCTACAACACACAAGGCTACTTCCCTGATTGGCATAACTACACACCAGGGCCAGGGATC…	MGGKWSKSKAGGWPAIRERMQQAEPAAEGVGAVSRDLEKHGAITSSNINNAACTWLEAQAQEEEEVGFPVRPQVPLRPMTYKGAFDLSFFLKEKGGLEGLIWSQKRQDILDLWVYNTQGYFPDWHNYTPGPGIRYPLTFGWCFKLVPVEPDKVEEATEGENNSLLHPICQHGMDDPEKEVLVWKFDSRLVYHHMAKEKHPEFYKDC*
6	1997_3	MG822963	101.899	86.781	91.1967	ATGGGTGGCAAGTGGTCAAAAAGTAAGGCGGGTGGATGGCCTGCTATAAGGGAAAGAATGCAACAAGCTGAGCCAGCAGCAGAAGGGGTGGGAGCAGTATCTCGAGACCTAGAAAAACATGGAGCGATCACAAGTAGCAATATAAATAATGCTGCTTGTACCTGGCTAGAAGCACAAGCACAAGAGGAGGAAGAGGTGGGTTTTCCAGTCAGACCTCAGGTACCTTTAAGACCAATGACTTACAAGGGAGCTTTTGATCTTAGCTTCTTTTTAAAAGAAAAGGGGGGACTGGAAGGGCTAATTTGGTCCCAAAAAAGACAAGACATCCTTGATTTGTGGGTCTACAACACACAAGGCTACTTCCCTGATTGGAATAACTACACACCAGGGCCAGGGGTC…	MGGKWSKSKAGGWPAIRERMQQAEPAAEGVGAVSRDLEKHGAITSSNINNAACTWLEAQAQEEEEVGFPVRPQVPLRPMTYKGAFDLSFFLKEKGGLEGLIWSQKRQDILDLWVYNTQGYFPDWNNYTPGPGVRYPLTFGWCFKLVPVEPDKVEEATEGENNSLLHPICQHGMDDPEKEVLVWKFDSRLAYHHMAREKHPEFYKDC*
7	1997_4	MG822974	100.743	90.6893	100.3	ATGGGTGGCAAGTGGTCAAAAAGTAAGGCGGGTGGATGGCCTGCTATAAGGGAAAGAATGCAACAAGCTGAGCCAGCAGCAGAAGGGGTGGGAGCAGTATCTCGAGACCTAGAAAAACATGGAGCGATCACAAGTAGCAATATAAATAATGCTGCTTGTACCTGGCTAGAAGCACAAGCACAAGAGGAGGAAGAGGTGGGTTTTCCAGTCAGACCCCAGGTACCTTTAAGACCAATGACTTACAAGGGAGCTTTTGATCTTAGCTTCTTTTTAAAAGAAAAGGGGGGACTGGAAGGGCTAATTTGGTCCCAAAAAAGACAAGACATCCTTGATTTGTGGGTCTACAACACACAAGGCTACTTCCCTGATTGGCATAACTACACACCAGGGCCAGGGATC…	MGGKWSKSKAGGWPAIRERMQQAEPAAEGVGAVSRDLEKHGAITSSNINNAACTWLEAQAQEEEEVGFPVRPQVPLRPMTYKGAFDLSFFLKEKGGLEGLIWSQKRQDILDLWVYNTQGYFPDWHNYTPGPGIRYPLTFGWCFKLVPVEPDKVEEATEGENNSLLHPICQHGMDDPEKEVLVWKFDSRLAYHHMAKEKHPEFYKDC*
8	1998_1	MG822960	100.704	84.9922	85.4718	ATGGGTGGCAAGTGGTCAAAAAGTAAGGCGGGTGGATGGCCTGCTATAAGGGAAAGAATGCAACAAGCTGAGCCAGCAGCAGAAGGGGTGGGAGCAGTATCTCGAGACCTAGAAAAACATGGAGCGATCACAAGTAGCAATATAAATAATGCTGCTTGTACCTGGCTAGAAGCACAAGCACAAGAGGAGGAAGAGGTGGGTTTTCCAGTCAGACCTCAGGTACCTTTAAGACCAATGACTTACAAGGGAGCTTTTGATCTTAGCTTCTTTTTAAAAGAAAAGGGGGGACTGGAAGGGCTAATTTGGTCCCAAAAAAGACAAGACATCCTTGATTTGTGGGTCTACAACACACAAGGCTACTTCCCTGATTGGCATAACTACACACCAGGACCAGGGATC…	MGGKWSKSKAGGWPAIRERMQQAEPAAEGVGAVSRDLEKHGAITSSNINNAACTWLEAQAQEEEEVGFPVRPQVPLRPMTYKGAFDLSFFLKEKGGLEGLIWSQKRQDILDLWVYNTQGYFPDWHNYTPGPGIRYPLTFGWCFKLVPVEPDKVEEATEGENNSLLHPICQHGMDDPEKEVLVWKFDSHLAYHHMAKEKHPEFYRDC*
9	1998_2	MG822955	102.668	94.9935	83.9776	ATGGGTGGCAAGTGGTCAAAAAGTAAGGCGGGTGGATGGCCTGCTATAAGGGAAAGAATGCAACAAGCTGAGCCAGCAGCAGAAGGGGTGGGAGCAGTATCTCGAGACCTAGAAAAACATGGAGCGATCACAAGTAGCAATATAAATAATGCTGCTTGTACCTGGCTAGAAGCACAAGCACAAGAGGAGGAAGAAGTGGGTTTTCCAGTCAGACCTCAGGTACCTTTAAGACCAATGACTTACAAGGGAGCTTTTGATCTTAGCTTCTTTTTAAAAGAAAAGGGGGGACTGGAAGGGCTAATTTGGTCCCAAAAAAGACAAGACATCCTTGATTTGTGGGTCTACAACACACAAGGCTACTTCCCTGATTGGCATAACTACACACCAGGGCCAGGGGTC…	MGGKWSKSKAGGWPAIRERMQQAEPAAEGVGAVSRDLEKHGAITSSNINNAACTWLEAQAQEEEEVGFPVRPQVPLRPMTYKGAFDLSFFLKEKGGLEGLIWSQKRQDILDLWVYNTQGYFPDWHNYTPGPGVRYPLTFGWCFKLVPVEPDKVEEATEGENNSLLHPICQHGMDDPEKEVLVWKFDSRLAYHHMAREKHPEFYRDC*
10	1998_3	MG822950	104.834	91.3537	98.8633	ATGGGTGGCAAGTGGTCAAAAAGTAAGGCGGGTGGATGGCCTGCTATAAGGGAAAGAATGCAACAAGCTGAGCCAGCAGCAGAAGGGGTGGGAGCAGTATCTCGAGACCTAGAAAAACATGGAGCGATCACAAGTAGCAATATAAATAATGCTGCTTGTACCTGGCTGGAAGCACAAGCACAAGAGGAGGAAGAGGTGGGTTTTCCAGTCAGACCTCAGGTACCTTTAAGACCAATGACTTACAAGGGAGCTTTTGATCTTAGCTTCTTTTTAAAAGAAAAGGGGGGACTGGAAGGGCTAATTTGGTCCCAAAAAAGACAAGACATCCTTGATTTATGGGTCTACAACACACAAGGCTACTTCCCTGATTGGCATAACTACACACCAGGGCCAGGGGTC…	MGGKWSKSKAGGWPAIRERMQQAEPAAEGVGAVSRDLEKHGAITSSNINNAACTWLEAQAQEEEEVGFPVRPQVPLRPMTYKGAFDLSFFLKEKGGLEGLIWSQKRQDILDLWVYNTQGYFPDWHNYTPGPGVRYPLTFGWCFKLVPVEPDKVEEATEGENNSLLHPICQHGMDDPEKEVLVWKFDSHLAYHHMAKEKHPEFYKDC*
11	1999_1	MG822968	103.317	94.8657	94.4582	ATGGGTGGCAAGTGGTCAAAAAGTAAGGCGGGTGGATGGCCTGCTATAAGGGAAAGAATGCAACAAGCTGAGCCAGCAGCAGAAGGGGTGGGAGCAGCATCTCGAGACCTAGAAAAACATGGAGCGATCACAAGTAGCAATATAAATAATGCTGCTTGTACCTGGCTAGAAGCACAAGCACAAGAGGAGGAAGAGGTGGGTTTTCCAGTCAGACCTCAGGTACCTTTAAGACCAATGACTTACAAGGGAGCTTTTGATCTTAGCTTCTTTTTAAAAGAAAAGGGGGGACTGGAAGGGCTAATTTGGTCCCAAAAAAGACAAGACATCCTTGATTTATGGGTCTACAACACACAAGGCTACTTCCCTGATTGGCATAACTACACACCAGGGCCAGGGGTC…	MGGKWSKSKAGGWPAIRERMQQAEPAAEGVGAASRDLEKHGAITSSNINNAACTWLEAQAQEEEEVGFPVRPQVPLRPMTYKGAFDLSFFLKEKGGLEGLIWSQKRQDILDLWVYNTQGYFPDWHNYTPGPGVRYPLTFGWCFKLVPVEPDKVEEATEGENNSLLHPICQHGMDDPEKEVLVWKFDSRLAYHHMAKEKHPEFYKDC*
12	1999_2	MG822953	102.38	91.7909	96.7998	ATGGGTGGCAAGTGGTCAAAAAGTAAGGCGGGTGGATGGCCTGCTATAAGGGAAAGAATGCAACAAGCTGAGCCAGCAGCAGAAGGGGTGGGAGCAGCATCTCGAGACCTAGAAAAACATGGAGCGATCACAAGTAGCAATATAAATAATGCTGCTTGTACCTGGCTAGAAGCACAAGCACAAGAGGAGGAAGAGGTGGGTTTTCCAGTCAGACCTCAGGTACCTTTAAGACCAATGACTTACAAGGGAGCTTTTGATCTTAGCTTCTTTTTAAAAGAAAAGGGGGGACTGGAAGGGCTAATTTGGTCCCAAAAAAGACAAGACATCCTTGATTTGTGGGTCTACAACACACAAGGCTACTTCCCTGATTGGCATAACTACACACCAGGGCCAGGGATC…	MGGKWSKSKAGGWPAIRERMQQAEPAAEGVGAASRDLEKHGAITSSNINNAACTWLEAQAQEEEEVGFPVRPQVPLRPMTYKGAFDLSFFLKEKGGLEGLIWSQKRQDILDLWVYNTQGYFPDWHNYTPGPGIRYPLTFGWCFKLVPVEPDKVEEATEGENNSLLHPICQHGMDDPEKEVLVWKFDSHLAYHHMAKEKHPEFYKDC*
13	1999_3	MG822957	104.111	97.211	92.8882	ATGGGTGGCAAGTGGTCAAAAAGCAAGGCGGGTGGATGGCCTGCTATAAGGGAAAGAATGCAACAAGCTGAGCCAGCAGCAGAAGGGGTGGGAGCAGTATCTCGAGACCTAGAAAAACATGGAGCGATCACAAGCAGCAATATAAATAATGCTGCTTGTACCTGGCTAGAAGCACAAGCACAAGAGGAGGAAGAGGTGGGTTTTCCAGTCAGACCTCAGGTACCTTTAAGACCAATGACTTACAAGGGAGCTTTTGATCTTAGCTTCTTTTTAAAAGAAAAGGGGGGACTGGAAGGGCTAATTTGGTCCCAAAAAAGACAAGACATCCTTGATTTGTGGGTCTACAACACACAAGGCTACTTCCCTGATTGGCATAACTACACACCAGGGCCAGGGGTC…	MGGKWSKSKAGGWPAIRERMQQAEPAAEGVGAVSRDLEKHGAITSSNINNAACTWLEAQAQEEEEVGFPVRPQVPLRPMTYKGAFDLSFFLKEKGGLEGLIWSQKRQDILDLWVYNTQGYFPDWHNYTPGPGVRYPLTFGWCFKLVPVEPDKVEEATEGENNSLLHPICQHGMDDPEKEVLVWKFDSRLAYHHMAREKHPEFYKDC*
14	1999_4	MG822954	98.9341	54.0882	78.2319	ATGGGTGGCAAGTGGTCAAAAAGTAAGGCGGGTGGATGGCCTGCTATAAGGGAAAGAATGCAACAAGCTGAGCCAGCAGCAGAAGGGGTGGGAGCAGCATCTCGAGACCTAGAAAAACATGGAGCGATCACAAGTAGCAATATAAATAATGCTGCTTGTACCTGGCTAGAAGCACAAGCACAAGAGGAGGAAGAGGTGGGTTTTCCAGTCAGACCTCAGGTACCTTTAAGACCAATGACTTACAAGGGAGCTTTTGATCTTAGCTTCTTTTTAAAAGAAAAGGGGGAACTGGAAGGGCTAATTTGGTCCCAAAAAAGACAAGACATCCTTGATTTGTGGGTCTACAACACACAAGGCTACTTCCCTGATTGGCATAACTACACACCAGGGCCAGGGATC…	MGGKWSKSKAGGWPAIRERMQQAEPAAEGVGAASRDLEKHGAITSSNINNAACTWLEAQAQEEEEVGFPVRPQVPLRPMTYKGAFDLSFFLKEKGELEGLIWSQKRQDILDLWVYNTQGYFPDWHNYTPGPGIRYPLTFGWCFKLVPVEPDKVEEATEGENNSLLHPICQHGMDDPEKEVLVWKFDSRLAYHHMAKEKHPEFYKDC*
15	2000_1	MG822951	102.187	99.8322	89.7806	ATGGGTGGCAAGTGGTCAAAAAGTAAGGCGGGTGGATGGCCTGCTATAAGGGAAAGAATGCAACAAGCTGAGCCAGCAGCAGAAGGGGTGGGAGCAGCATCTCGAGACCTAGAAAAACATGGAGCGATCACAAGTAGCAATATAAATAATGCTGCTTGTACCTGGCTAGAAGCACAAGCACAAGAGGAGGAAGAGGTGGGTTTTCCAGTCAGACCTCAGGTACCTTTAAGACCAATGACTTACAAGGGAGCTTTTGATCTTAGCTTCTTTTTAAAAGAAAAGGGGGGACTGGAAGGGCTAATTTGGTCCCAAAAAAGACAAGACATCCTTGATTTGTGGGTCTACCACACACAAGGCTACTTCCCTGATTGGCAGAACTACACACCAGGGCCAGGGGTC…	MGGKWSKSKAGGWPAIRERMQQAEPAAEGVGAASRDLEKHGAITSSNINNAACTWLEAQAQEEEEVGFPVRPQVPLRPMTYKGAFDLSFFLKEKGGLEGLIWSQKRQDILDLWVYHTQGYFPDWQNYTPGPGVRYPLTFGWCFKLVPVEPDKVEEATEGENNSLLHPICQHGMDDPEKEVLVWKFDSRLAYHHMAREKHPEFYKDC*
16	2000_2	MG822943	102.638	85.127	98.2802	ATGGGTGGCAAGGGGTCAAAAAGTAAGGCGGGTGGATGGCCTGCTATAAGGGAAAGAATGCAACAAGCTGAGCCAGCAGCAGAAGGGGTGGGAGCAGCATCTCGAGACCTAGAAAAACATGGAGCGATCACAAGTAGCAATATAAATAATGCTGCTTGTACCTGGCTAGAAGCACAAGCACAAGAGGAGGAAGAGGTGGGTTTTCCAGTCAGACCTCAGGTACCTTTAAGACCAATGACTTACAAGGGAGCTTTTGATCTTAGCTTCTTTTTAAAAGAAAAGGGGGGACTGGAAGGGCTAATTTGGTCCCAAAAAAGACAAGACATCCTTGATTTGTGGGTCTACCACACACAAGGCTACTTCCCTGATTGGCAGAACTACACACCAGGGCCAGGGGTC…	MGGKGSKSKAGGWPAIRERMQQAEPAAEGVGAASRDLEKHGAITSSNINNAACTWLEAQAQEEEEVGFPVRPQVPLRPMTYKGAFDLSFFLKEKGGLEGLIWSQKRQDILDLWVYHTQGYFPDWQNYTPGPGVRYPLTFGWCFKLVPVEPEKVEEATEGENNSLLHPICQHGMDDPEKEVLVWKFDSHLAYHHMAKEKHPEFYKDC*
17	2000_3	MG822979	100.799	76.1089	88.7099	ATGGGTGGCAAGTGGTCAAAAAGCAAGGCGGGTGGATGGCCTGCTATAAGGGAAAGAATGCAACAAGCTGAGCCAGCAGCAGAAGGGGTGGGAGCAGCATCTCGAGACCTAGAAAAACATGGAGCGATCACAAGTAGCAATATAAATAATGCTGCTTGTACCTGGCTAGAAGCACAAGCACAAGAGGAGGAAGAGGTGGGTTTTCCAGTCAGACCTCAGGTACCTTTAAGACCAATGACTTACAAGGGAGCTTTTGATCTTAGCTTCTTTTTAAAAGAAAAGGGGGGACTGGAAGGGCTAATTTGGTCCCAAAAAAGACAAGACATCCTTGATTTGTGGGTCTACCACACACAAGGCTACTTCCCTGATTGGCATAACTACACACCAGGGCCAGGGGTC…	MGGKWSKSKAGGWPAIRERMQQAEPAAEGVGAASRDLEKHGAITSSNINNAACTWLEAQAQEEEEVGFPVRPQVPLRPMTYKGAFDLSFFLKEKGGLEGLIWSQKRQDILDLWVYHTQGYFPDWHNYTPGPGVRYPLTFGWCFKLVPVEPEKVEEATEGENNSLLHPICQHGMDDPEKEVLVWKFDSHLAYHHMAKEKHPEFYKDC*
18	2000_4	MG822987	100.183	43.5649	93.9663	ATGGGTGGCAAGTGGTCAAAAGGTAAGGCGGGTGGATGGCCTGCTATAAGGGAAAGAATGCAACAAGCTGAGCCAGCAGCAGAAGGGGTGGGAGCAGCATCTCGAGACCTAGAAAAACATGGAGCGATCACAAGTAGCAATATAAATAATGCTGCTTGTACCTGGCTAGAAGCACAAGCACAAGAGGAGGAAGAGGTGGGTTTTCCAGTCAGACCTCAGGTACCTTTAAGACCAATGACTTACAAGGGAGCTTTTGATCTTAGCTTCTTTTTAAAAGAAAAGGGGGGACTGGAAGGGCTAATTTGGTCCCAGAAAAGGCAAGACATCCTTGATTTGTGGGTCTACCACACACAAGGCTACTTCCCTGATTGGCATAACTACACACCAGGGCCAGGGGTC…	MGGKWSKGKAGGWPAIRERMQQAEPAAEGVGAASRDLEKHGAITSSNINNAACTWLEAQAQEEEEVGFPVRPQVPLRPMTYKGAFDLSFFLKEKGGLEGLIWSQKRQDILDLWVYHTQGYFPDWHNYTPGPGVRYPLTFGWCFKLVPVEPDKVEEATEGENNSLLHPICQHGMDDPEKEVLVWKFDSHLAYHHMAKEKHPEFYKDC*
19	2000_5	MG822991	101.677	93.5862	73.6548	ATGGGTGGCAAGTGGTCAAAAAGCAAGGCGGGTGGATGGCCTGCTATAAGGGAAAGAATGCAACAAGCTGAGCCAGCAGCAGAAGGGGTGGGAGCAGTATCTCGAGACCTAGGAAAACATGGAGCGATCACAAGTAGCAATATAAATAATGCTGCTTGTACCTGGCTAGAAGCACAAGCACAAGAGGAGGAAGAGGTGGGTTTTCCAGTCAGACCTCAGGTACCTTTAAGACCAATGACTTACAAGGGAGCTTTTGATCTTAGCTTCTTTTTAAAAGAAAAGGGGGGACTGGAAGGGCTAATTTGGTCCCAAAAAAGACAAGACATCCTTGATTTGTGGGTCTACAACACACAAGGCTACTTCCCTGATTGGCATAACTACACACCAGGGCCAGGGGTC…	MGGKWSKSKAGGWPAIRERMQQAEPAAEGVGAVSRDLGKHGAITSSNINNAACTWLEAQAQEEEEVGFPVRPQVPLRPMTYKGAFDLSFFLKEKGGLEGLIWSQKRQDILDLWVYNTQGYFPDWHNYTPGPGVRYPLTFGWCFKLVPVEPDKVEEATEGENNSLLHPICQHGMDDPEKEVLVWKFDSHLAYHHMAKEKHPEFYKDC*
20	2001_1	MG822988	102.041	90.0061	76.691	ATGGGTGGCAAGTGGTCAAAAAGCAAGGCGGGTGGATGGCCTGCTATAAGGGAAAAAATGCAACAAGCTGAGCCAGCAGCAGAAGGGGTGGGAGCAGCATCTCGAGACCTAGAAAAACATGGAGCGATCACAAGTAGCAATATAAATAATGCTGCTTGTACCTGGCTAGAAGCACAAGCACAAGAGGAGGAAGAGGTGGGTTTTCCAGTCAGACCTCAGGTACCTTTAAGACCAATGACTTACAAGGGAGCTTTTGATCTTAGCTTCTTTTTAAAAGAAAAGGGGGGACTGGAAGGGCTAATTTGGTCCCAGAAAAGACAAGACATCCTTGATTTGTGGGTCTACAACACACAAGGCTACTTCCCTGATTGGCATAACTACACACCAGGGCCAGGGGTC…	MGGKWSKSKAGGWPAIREKMQQAEPAAEGVGAASRDLEKHGAITSSNINNAACTWLEAQAQEEEEVGFPVRPQVPLRPMTYKGAFDLSFFLKEKGGLEGLIWSQKRQDILDLWVYNTQGYFPDWHNYTPGPGVRYPLTFGWCFKLVPVEPDKVEEATEGENNSLLHPICQHGMDDPEKEVLVWKFDSHLAYHHMAKEKHPEFYKDC*
21	2001_2	MG822944	104.921	95.7609	93.5394	ATGGGTGGCAAGTGTTCAAAAAGTAAGGCGGGTGGATGGCCTGCTATAAGGGAAAGAATGCAACAAACTGAGCCAGCAGCAGAAGGGGTGGGAGCAGCATCTCGAGACCTAGAAAAACATGGAGCGATCACAAGTAGCAATATAAATAATGCTGCTTGTACCTGGCTAGAAGCACAAGCACAAGAGGAGGAAGAGGTGGGTTTTCCAGTCAGACCTCAGGTACCTTTAAGACCAATGACTTACAAGGGAGCTTTTGATCTTAGCTTCTTTTTAAAAGAAAAGGGGGGACTGGAAGGGCTAATTTGGTCTCAGAAAAGACAAGACATCCTTGATTTGTGGGTCTACAACACACAAGGCTACTTCCCTGATTGGCATAACTACACACCAGGGCCAGGGGTC…	MGGKCSKSKAGGWPAIRERMQQTEPAAEGVGAASRDLEKHGAITSSNINNAACTWLEAQAQEEEEVGFPVRPQVPLRPMTYKGAFDLSFFLKEKGGLEGLIWSQKRQDILDLWVYNTQGYFPDWHNYTPGPGVRYPLTFGWCFKLVPVEPEKVEEATEGENNSLLHPMCQHGMDDPEKEVLVWKFDSHLAYHHMAKEKHPEFYKDC*
22	2001_3	MG822982	100.8	80.7319	87.1992	ATGGGTGGCAAGTGGTCAAAAAGTAAGGCGGGTGGATGGCCTGCTATAAGGGAAAGAATGCAACAAACTGGGCCAGCAGCAGAAGGGGTGGGAGCAGCATCTCGAGACCTAGAAAAACATGGAGCGATCACAAGTAGCAATATAAATAATGCTGCTTGTACCTGGCTAGAAGCGCAAGCACAAGAGGAGGAAGAGGTGGGTTTTCCAGTCAGACCTCAGGTACCTTTAAGACCAATGACTTACAAGGGAGCTTTTGATCTTAGCTTCTTTTTAAAAGAAAAGGGGGGACTGGAAGGGCTAATTTGGTCCCAGAAAAGACAAGACATCCTTGATTTGTGGGTCTACAACACACAAGGCTACTTCCCTGATTGGCATAACTACACACCAGGGCCAGGGGTC…	MGGKWSKSKAGGWPAIRERMQQTGPAAEGVGAASRDLEKHGAITSSNINNAACTWLEAQAQEEEEVGFPVRPQVPLRPMTYKGAFDLSFFLKEKGGLEGLIWSQKRQDILDLWVYNTQGYFPDWHNYTPGPGVRYPLTFGWCFKLVPVEPDKVEEATEGENNSLLHPICQHGMDDPEKEVLVWKFDSHLAYHHMAKEKHPEFYKDC*
23	2002_1	MG822928	101.758	65.1573	60.2047	ATGGGTGGCAAGTGGTCAAAAAGAAAGGCGGATGGATGGCCTGCTATAAGGGAAAAAATGCAACAAGCTGAGCCAGCAGCAGAAGGGGTGGGAGCAGCATCTCGAGACCTAGAAAAACATGGAGCGATCACAAGTAGCAATATAAATAATGCTGCTTGTACCTGGCTAGAAGCACAAGCACAGGAGGAGGAAGAGGTGGGTTTTCCAGTCAGACCTCAGGTACCTTTAAGACCAATGACTTACAAGGGAGCTTTTGATCTTAGCTTCTTTTTAAAAGAAAAGGGGGGACTGGAAGGGCTAATTTGGTCTCAGAAAAGACAAGACATCCTTGATTTGTGGGCCTACAACACACAAGGCTACTTCCCTGATTGGCAGAACTACACACCAGGGCCAGGGGTC…	MGGKWSKRKADGWPAIREKMQQAEPAAEGVGAASRDLEKHGAITSSNINNAACTWLEAQAQEEEEVGFPVRPQVPLRPMTYKGAFDLSFFLKEKGGLEGLIWSQKRQDILDLWAYNTQGYFPDWQNYTPGPGVRYPLTFGWCFKLVPVEPDKVEEATEGENNSLLHPICQHGMDDPEKEVLVWKFDSRLAYHHMAKEKHPEFYKDC*
24	2002_2	MG823007	103.353	89.8365	86.3799	ATGGGTAGCAAGTGTTCAAAAAGTAAGGCGGGTGGATGGCCTGCTATAAGGGAAAGAATGCAACAAGCTGAGCCAGCAGCAGAAGGGGTGGGAGCAGCATCTCGAGACCTAGAAAAACATGGAGCGATCACAAGTAGCAATATAAATAATGCTGCTTGTACCTGGCTAGAAGCACAAGCACAAGAGGAGGAAGAGGTGGGTTTTCCAGTCAGACCTCAGGTACCTTTAAGGCCAATGACTTACAAGGGAGCTTTTGATCTTAGCTTCTTTTTAAAAGAAAAGGGGGGACTGGAAGGGCTAATTTGGTCCCAGAAAAGACAAGACATCCTTGATTTATGGGTCTACAACACACAAGGCTACTTCCCTGATTGGCATAACTACACACCAGGGCCAGGGGTC…	MGSKCSKSKAGGWPAIRERMQQAEPAAEGVGAASRDLEKHGAITSSNINNAACTWLEAQAQEEEEVGFPVRPQVPLRPMTYKGAFDLSFFLKEKGGLEGLIWSQKRQDILDLWVYNTQGYFPDWHNYTPGPGVRYPLTFGWCFKLVPVEPDKVEEATEGENNSLLHPICQHGMDDPEKEVLVWKFDSRLAYHHMAKEKHPEFYKDC*
25	2002_3	MG822983	103.092	84.676	76.1988	ATGGGTGGCAAGTGGTCAAAAAGCAAGGCGGGTGGATGGCCTGCTATAAGGGAAAGAATGCAACAAGCTGAGCCAGCAGCAGAAGGGGTGGGAGCAGCATCTCGAGACCTAGAAAAACATGGAGCGATCACAAGTAGCAATATAAATAATGCTGCTTGTACCTGGCTAGAAGCACAAGCACAAGAGGAGGAAGAGGTGGGTTTTCCAGTCAGACCTCAGGTACCTTTAAGACCAATGACTTACAAGGGAGCTTTTGATCTTAGCTTCTTTTTAAAAGAAAAGGGGGGACTGGAAGGGCTAATTTGGTCTCAGAAAAGACAAGACATCCTTGATTTGTGGGTCTACAACACACAAGGCTACTTCCCTGATTGGCATAACTACACACCAGGGCCAGGGGTC…	MGGKWSKSKAGGWPAIRERMQQAEPAAEGVGAASRDLEKHGAITSSNINNAACTWLEAQAQEEEEVGFPVRPQVPLRPMTYKGAFDLSFFLKEKGGLEGLIWSQKRQDILDLWVYNTQGYFPDWHNYTPGPGVRYPLTFGWCFKLVPVEPDKVEEATEGENNSLLHPICQHGMDDPEKEVLVWKFDSHLAYHHMAKEKHPEFYKDC*
26	2002_4	MG822946	99.0875	80.4969	38.8872	ATGGGTGGCAAGTGTTCAAAAAGTAAGGCGGGTGGATGGCCTGCTATAAGGGAAAGAATGCAACAAGCTGAGTCAGCAGCAGAAGGGGTGGGAGCAGCATCTCGAGACCTAGAAAAACATGGAGCGATCACAAGTAGCAATATAAATAATGCTGCTTGTACCTGGCTAGAAGCACAAGCACAAGAGGAGGAAGAGGTGGGTTTTCCAGTCAGACCTCAGGTACCTTTAAGACCAATGACTTACAAGGGAGCTTTTGATCTTAGCTTCTTTTTAAAAGAAAAGGGGGGACTGGAAGGGCTAATTTGGTCCCAGAAAAGACAAGACATCCTTGATTTGTGGGTCTACAACACACAAGGCTACTTCCCTGATTGGCATAACTACACACCAGGGCCAGGGGTC…	MGGKCSKSKAGGWPAIRERMQQAESAAEGVGAASRDLEKHGAITSSNINNAACTWLEAQAQEEEEVGFPVRPQVPLRPMTYKGAFDLSFFLKEKGGLEGLIWSQKRQDILDLWVYNTQGYFPDWHNYTPGPGVRYPLTFGWCFKLVPVEPDKVEEATEGENNSLLHPICQHGMDDPEKEVLVWKFDSHLAYHHMAKEKHPEFYKDC*
27	2003_1	MG823014	96.7094	86.8243	47.0813	ATGGGTGGCAAGTGTTCAAAAAGTAAGGCGGGTGGATGGCCTGCTATAAGGGAAAGAATGCAACAAGCTGAGCCAGCAGCAGAAGGGGTGGGAGCAGCATCTCGGGACCTAGAAAAACATGGAGCGATCACAAGTAGCAATATAAATAATGCTGCTTGTACCTGGCTAGAAGCACAAGCACAAGAGGAGGAAGAGGTGGGTTTTCCAGTCAGACCTCAGGTACCTTTAAGACCAATGACTTACAAGGGAGCTTTTGATCTTAGCTTCTTTTTAAAAGAAAAGGGGGGACTGGAAGGGCTAATTTGGTCTCAGAAAAGACAAGATATCCTTGATTTGTGGGTCTACAACACACAAGGCTACTTCCCTGATTGGCATAACTACACACCAGGGCCAGGGGTC…	MGGKCSKSKAGGWPAIRERMQQAEPAAEGVGAASRDLEKHGAITSSNINNAACTWLEAQAQEEEEVGFPVRPQVPLRPMTYKGAFDLSFFLKEKGGLEGLIWSQKRQDILDLWVYNTQGYFPDWHNYTPGPGVRYPLTFGWCFKLVPVDPDKVEEATEGENNSLLHPMCQHGMDDPEKEALMWKFDSHLAYHHMAKEKHPEFYKDC*
28	2003_2	MG822929	101.474	97.7558	93.5986	ATGGGTGGCAAGTGGTCAAAACGTAAGACGGGTGGATGGCCTGATATAAGGGAAAGAATGCAACAAGCTGAGCCAGCAGCAGAAGGGGTGGGAGCAGTATCTCGAGACCTAGAAAAACATGGAGCGATCACAAGTAGCAATATAAATAATGCTGCTTGTACCTGGCTAGAAGCACAAGCACAAGAGGAGGAAGAGGTGGGTTTTCCAGTCAGACCTCAGGTACCTTTAAGACCAATGACTTACAAGGGAGCTTTTGATCTTAGCTTCTTTTTAAAAGAAAAGGGGGGACTGGAAGGGCTAATTTGGTCTCAGAAAAGACAAGACATCCTTGATTTGTGGGTATACAACACACAAGGCTACTTCCCTGATTGGCATAACTACACACCAGGGCCAGGGGTC…	MGGKWSKRKTGGWPDIRERMQQAEPAAEGVGAVSRDLEKHGAITSSNINNAACTWLEAQAQEEEEVGFPVRPQVPLRPMTYKGAFDLSFFLKEKGGLEGLIWSQKRQDILDLWVYNTQGYFPDWHNYTPGPGVRYPLTFGWCFKLVPVEPDKVEEATEGENNSLLHPICQHGMDDPEKEVLVWKFDSHLAYHHMAKEKHPEFYKDC*
29	2003_3	MG822999	102.205	72.7536	93.8335	ATGGGTAGCAAGTGTTCAAAAAGTAAGGCGGGTGGATGGCCTGCTATAAGGGAAAGAATGCAACAAACTGAGCCAGCAGCAGAAGGGGTGGGAGCAGCATCTCGAGACCTAGAAAAACATGGAGCGATCACAAGTAGCAATATAAATAATGCTGCTTGTACCTGGCTAGAAGCACAAGCACAAGAGGAGGAAGAGGTGGGTTTTCCAGTCAGACCTCAGGTACCTTTAAGGCCAATGACTTACAAGGGAGCTTTTGATCTTAGCTTCTTTTTAAAAGAAAAGGGGGGACTGGAAGGGCTAATTTGGTCCCAGAAAAGACAAGACATCCTTGATTTGTGGGTCTACAACACACAAGGCTACTTCCCTGATTGGCATAACTACACACCAGGGCCAGGGGTC…	MGSKCSKSKAGGWPAIRERMQQTEPAAEGVGAASRDLEKHGAITSSNINNAACTWLEAQAQEEEEVGFPVRPQVPLRPMTYKGAFDLSFFLKEKGGLEGLIWSQKRQDILDLWVYNTQGYFPDWHNYTPGPGVRYPLTFGWCFKLVPVDPDKVEEATEGENNSLLHPMCQHGMDDPEKEVLMWKFDSHLAYHHMAKEKHPEFYKDC*
30	2003_4	MG822927	103.788	68.4708	85.8954	ATGGGTGGCAAGTGGTCAAAAAGAAAGGCGGATGGATGGCCTGCTATAAGGGAAAGAATGCAACAAGCTGAGCCAGCAGCAGAAGGGGTGGGAGCAGCATCTCGAGACCTAGAAAAACATGGAGCGATCACAAGTAGCAATATAAATAATGCTGCTTGTACCTGGCTAGAAGCACAAGCACAGGAGGAGGAAGAGGTGGGTTTTCCAGTCAGACCTCAGGTACCTTTAAGGCCAATGACTTACAAGGGAGCTTTTGATCTTAGCTTCTTTTTAAAAGAAAAGGGGGGACTGGAAGGGCTAATTTGGTCTCAGAAAAGACAAGACATCCTTGATTTGTGGGCCTACAACACACAAGGCTACTTCCCTGATTGGCAGAACTACACACCAGGGCCAGGGGTC…	MGGKWSKRKADGWPAIRERMQQAEPAAEGVGAASRDLEKHGAITSSNINNAACTWLEAQAQEEEEVGFPVRPQVPLRPMTYKGAFDLSFFLKEKGGLEGLIWSQKRQDILDLWAYNTQGYFPDWQNYTPGPGVRYPLTFGWCFKLVPVEPDKVEEATEGENNSLLHPICQHGMDDPEKEVLVWKFDSRLAYHHMAREKHPEFYKDC*
31	2003_5	MG822945	98.9729	91.7924	98.2251	ATGGGTGGCAAGTGGTCAAAGCGTAAGGCGGGTGGATGGCCTGCTATAAGGGAAAGAATGCAACAAGCTGAGCCAGCAGCAGAAGGGGTGGGAGCAGCATCTCGAGACCTAGAAAAACATGGAGCGATCACAAGTAGCAATATAAATAATGCTGCTTGTACCTGGCTAGAAGCACAAGCACAAGAGGAGGAAGAGGTGGGTTTCCCAGTCAGACCTCAGGTACCTTTAAGGCCAATGACTTACAAGGGAGCTTTTGATCTTAGCTTCTTTTTAAAAGAAAAGGGGGGACTGGAAGGGCTAATTTGGTCCCAGAAAAGACAAGACATCCTTGATTTGTGGGTCTACCACACACAAGGCTACTTCCCTGATTGGCATAACTACACACCAGGGCCAGGGGTC…	MGGKWSKRKAGGWPAIRERMQQAEPAAEGVGAASRDLEKHGAITSSNINNAACTWLEAQAQEEEEVGFPVRPQVPLRPMTYKGAFDLSFFLKEKGGLEGLIWSQKRQDILDLWVYHTQGYFPDWHNYTPGPGVRYPLTFGWCFKLVPVEPDKVEEATEGENNSLLHPMCQHGMDDPEKEVLVWKFDSRLAYHHMAKEKHPEFYKDC*
32	2004_1	MG823004	98.7689	79.7461	104.537	ATGGGTAGCAAGTGCTCAAAAAGTAAGGCGGGTGGATGGCCTGCTATAAGGGAAAGAATGCAACAAGCTGAGCCAGCAGCAGAAGGGGTGGGAGCAGCATCTCGGGACCTAGAAAAACACGGAGCGATCACAAGTAGCAATATAAATAATGCTGCTTGTACCTGGCTAGAAGCACAAGCACAAGAGGAGGAAGAGGTGGGTTTTCCAGTCAGACCTCAGGTACCTTTAAGGCCAATGACTTACAAGGGAGCTTTTGATCTTAGCTTCTTTTTAAAAGAAAAGGGGGGACTGGAAGGGCTAATTTGGTCTCAGAAAAGACAAGACATCCTTGATTTATGGGTCTACAACACACAAGGCTACTTCCCTGATTGGCATAACTACACACCAGGGCCAGGGGTC…	MGSKCSKSKAGGWPAIRERMQQAEPAAEGVGAASRDLEKHGAITSSNINNAACTWLEAQAQEEEEVGFPVRPQVPLRPMTYKGAFDLSFFLKEKGGLEGLIWSQKRQDILDLWVYNTQGYFPDWHNYTPGPGVRYPLTFGWCFKLVPVDPDKVEEATEGENNSLLHPMCQHGMDDPEKEVLMWKFDSRLAYHHMAREKHPEFYKDC*
33	2004_2	MG823000	102.06	74.9356	93.7499	ATGGGTGGCAAGTGTTCAAAAGGTAAGGCGGGTGGGTGGCCTGCTATAAGGGAAAGAATGCAACAA---GAGCCAGCAGCAGAAGGGGTGGGAGCAGCATCTCGAGACCTAGAAAAACATGGAGCGATCACAAGTAGCAATATAAATAATGCTGCTTGTACCTGGCTAGAAGCACAAGCACAAGAGGAGGAAGAGGTGGGTTTTCCAGTCAGACCTCAGGTACCTTTAAGGCCAATGACTTACAAGGGAGCTTTTGATCTTAGCTTCTTTTTAAAAGAAAAGGGGGGACTGGAAGGGCTAATTTGGTCCCAGAAAAGACAAGACATCCTTGATTTGTGGGTCTACAACACACAAGGCTACTTCCCTGATTGGCATAACTACACACCAGGGCCAGGGGTC…	MGGKCSKGKAGGWPAIRERMQQ-EPAAEGVGAASRDLEKHGAITSSNINNAACTWLEAQAQEEEEVGFPVRPQVPLRPMTYKGAFDLSFFLKEKGGLEGLIWSQKRQDILDLWVYNTQGYFPDWHNYTPGPGVRYPLTFGWCFKLVPVEPDKVEEATEGENNSLLHPMCQHGMDDPEKEVLMWKFDSHLAYHHMAKEKHPEFYKDC*
34	2004_3	MG823011	101.54	88.1222	94.4613	ATGGGTGGCAAGTGTTCAAAAAGTAAGGCGGGTGGATGGCCTGCTATAAGGGAAAGAATGCAACAAGCTGAGCCAGCAGCAGAAGGGGTGGGAGCAGCATCTCGGGACCTAGAAAAACATGGAGCGATCACAAGTAGCAATATAAATAATGCTGCTTGTACCTGGCTAGAAGCACAAGCACAAGAGGAGGAAGAGGTGGGTTTTCCAGTCAGACCTCAGGTACCTTTAAGACCAATGACCTACAAGGGAGCTTTTGATCTTAGCTTCTTTTTAAAAGAAAAGGGGGGACTGGAAGGGCTAATTTGGTCTCAGAAAAGACAAGACATCCTTGATTTGTGGGTCTACAACACACAAGGCTACTTCCCTGATTGGCATAACTACACACCAGGGCCAGGGGTC…	MGGKCSKSKAGGWPAIRERMQQAEPAAEGVGAASRDLEKHGAITSSNINNAACTWLEAQAQEEEEVGFPVRPQVPLRPMTYKGAFDLSFFLKEKGGLEGLIWSQKRQDILDLWVYNTQGYFPDWHNYTPGPGVRYPLTFGWCFKLVPVDPDKVEEATEGENNSLLHPMCQHGMDDPEKEVLVWKFDSHLAYHHMAKEKHPEFYKDC*
35	2004_4	MG823005	99.3045	73.4641	93.1645	ATGGGTAGCAAGTGTTCAAAAAGTAAGACAGGTGGATGGCCTGCTATAAGGGAAAGAATGCAACAAGCTGAGTCAGCAGCAGAAGGGGTGGGAGCAGCATCTCGAGACCTAGAAAAACATGGAGCGATCACAAGTAGCAATATAAATAATGCTGCTTGTACCTGGCTAGAAGCACAAGCACAAGAGGAGGAAGAGGTGGGTTTTCCAGTCAGACCTCAGGTACCTTTAAGACCAATGACTTACAAGGGAGCTTTTGATCTTAGCTTCTTTTTAAAAGAAAAGGGGGGACTGGAAGGGCTAATTTGGTCCCAGAAAAGACAAGACATCCTTGATTTATGGGTCTACAACACACAAGGCTACTTCCCTGATTGGCATAACTACACACCAGGGCCAGGGGTC…	MGSKCSKSKTGGWPAIRERMQQAESAAEGVGAASRDLEKHGAITSSNINNAACTWLEAQAQEEEEVGFPVRPQVPLRPMTYKGAFDLSFFLKEKGGLEGLIWSQKRQDILDLWVYNTQGYFPDWHNYTPGPGVRYPLTFGWCFKLVPVDPDKVEEATEGENNSLLHPMCQHGMDDPEKEVLMWKFDSRLAYHHMAREKHPEFYKDC*
36	2004_5	MG822941	102.334	62.2769	102.803	ATGGGTGGCAAGTGTTCAAAAGGTAAGGCGGGTGGATGGCCTGCTATAAGGGAAAGAATGCAACAAGCTGAGCCAGCAGCAGAAGGGGTGGGAGCAGCATCTCGGGACCTAGAAAAACATGGAGCGATCACAAGTAGCAATATAAATAATGCTGCTTGTACCTGGCTAGAAGCACAAGCACAAGAGGAGGAAGAGGTGGGTTTTCCAGTCAGACCTCAGGTACCTTTAAGGCCAATGACTTACAAGGGAGCTTTTGATCTTAGCCTCTTTTTAAAAGAAAAGGGGGGACTGGAAGGGCTAATTTGGTCTCAGAAAAGACAAGACATCCTTGATTTGTGGGTCTACAACACACAAGGCTACTTCCCTGATTGGCATAACTACACACCAGGGCCAGGGGTC…	MGGKCSKGKAGGWPAIRERMQQAEPAAEGVGAASRDLEKHGAITSSNINNAACTWLEAQAQEEEEVGFPVRPQVPLRPMTYKGAFDLSLFLKEKGGLEGLIWSQKRQDILDLWVYNTQGYFPDWHNYTPGPGVRYPLTFGWCFKLVPVDPDKVEEATEGENNNLLHPMCQHGMDGPEKEVLVWKFDSRLAYHHMAKEKHPEFYKDC*
37	2005_1	MG822938	98.6663	77.7454	79.9364	ATGGGTGGCAAGTGTTCAAAACGTAAGACGGGTGGATGGCCTGCTATAAGGGAAAGAATGCAACAAGCTGAGCCAGCAGCAGAAGGGGTGGGAGCAGCATCTCGAGACCTAGAAAGACATGGAGCGATCACAAGTAGCAATATAAATAATGCTGCTTGTACCTGGCTAGAAGCACAAGCACAAGAGGAGGAAGAGGTGGGTTTTCCAGTCAGACCTCAGGTACCTTTAAGGCCAATGACTTACAAGGGAGCGTTTGATCTTAGCTTCTTTTTAAAAGAAAAGGGGGGACTGGAAGGGCTAATTTGGTCTCAGAAAAGACAAGACATCCTTGACTTGTGGGTCTACAACACACAAGGCTACTTCCCTGATTGGCATAACTACACACCAGGGCCAGGGGTC…	MGGKCSKRKTGGWPAIRERMQQAEPAAEGVGAASRDLERHGAITSSNINNAACTWLEAQAQEEEEVGFPVRPQVPLRPMTYKGAFDLSFFLKEKGGLEGLIWSQKRQDILDLWVYNTQGYFPDWHNYTPGPGVRYPLTFGWCFKLVPVDPDKVEEATEGENNSLLHPMCQHGMDDPEKEVLVWKFDSHLAYHHMAKEKHPEFYKDC*
38	2005_2	MG822995	100.099	54.4477	91.1717	ATGGGTGGCAAGTGTTCAAAACGTAAGACGGGTGGATGGCCTGCTATAAGGGAAAGAATGCAACAAGCTGAGCCAGCAGCAGAAGGGGTGGGAGCAGCATCTCGAGACCTAGAAAGACATGGAGCGATCACAAGTAGCAATATAAATAATGCTGCTTGTACCTGGCTAGAAGCACAAGCACAAGAGGAGGAAGAGGTGGGTTTTCCAGTCAGACCTCAGGTACCTTTAAGACCAATGACTTACAAGGGAGCTTTTGATCTTAGCTTCTTTTTAAAAGAAAAGGGGGGACTGGAAGGGCTAATTTGGTCTCAGAAAAGACAAGACATCCTTGACTTGTGGGTCTACAACACACAAGGCTACTTCCCTGATTGGCATAACTACACACCAGGGCCAGGGGTC…	MGGKCSKRKTGGWPAIRERMQQAEPAAEGVGAASRDLERHGAITSSNINNAACTWLEAQAQEEEEVGFPVRPQVPLRPMTYKGAFDLSFFLKEKGGLEGLIWSQKRQDILDLWVYNTQGYFPDWHNYTPGPGVRYPLTFGWCFKLVPVDPDKVEEATEGENNSLLHPMCQHGMDDPEKEVLMWKFDSHLAYHHMAKEKHPEFYKDC*
39	2005_3	MG822993	51.0877	0	30.5128	ATGGGTGGCAAATGTTCAAAACGTAAGACGGGTGGATGGCCTGCTATAAGGGAAAGAATGCAACAAGCTGAGACAGCAGCAGAAGGGGTGGGAGCAGCATCTCGAGACCTAGAAAAACATGGAGCGATCACAAGTAGCAATATAAATAATGCTGCTTGTACCTGGCTAGAAGCACAAGCACAAGAGGAGGAAGAGGTGGGTTTTCCAGTCAGACCTCAGGTACCTTTAAGACCAATGACTTACAAGGGAGCATTTGATCTTAGCTTCTTTTTAAAAGAAAAGGGGGGACTGGAAGGGCTAATTTGGTCTCAGAAAAGACAAGACATCCTTGATTTGTGGGTCTACAACACACAAGGCTACTTCCCTGATTGGCATAACTACACACCAGGGCCAGGGGTC…	MGGKCSKRKTGGWPAIRERMQQAETAAEGVGAASRDLEKHGAITSSNINNAACTWLEAQAQEEEEVGFPVRPQVPLRPMTYKGAFDLSFFLKEKGGLEGLIWSQKRQDILDLWVYNTQGYFPDWHNYTPGPGVRYPLTFGLCFKLVPVDPDKVEEATEGENNSLLHPMCQHGMDDPEKEVLMWKFDSHLAYHHMAKEKHPEFYKDC*
40	2005_4	MG822937	100.789	86.883	93.1554	ATGGGTGGCAAGTGTTCAAAACGTAAGACGGGTGGATGGCCTGCTATAAGGGAAAGAATGCAACAAGCTGAGACAGCAGCAGAAGGGGTGGGAGCAGCATCTCGAGACCTAGAAAAACATGGAGCGATCACAAGTAGCAATATAAATAATGCTGCTTGTACCTGGCTAGAAGCACAAGCACAAGAGGAGGAAGAGGTGGGTTTTCCAGTCAGACCTCAGGTACCTTTAAGGCCAATGACTTACAAGGGAGCGTTTGATCTTAGCTTCTTTTTAAAAGAAAAGGGGGGACTGGAAGGGCTAATTTGGTCCCAGAAAAGACAAGACATCCTTGATTTATGGGTCTACAACACACAAGGCTACTTCCCTGATTGGCATAACTACACACCAGGGCCAGGGGTC…	MGGKCSKRKTGGWPAIRERMQQAETAAEGVGAASRDLEKHGAITSSNINNAACTWLEAQAQEEEEVGFPVRPQVPLRPMTYKGAFDLSFFLKEKGGLEGLIWSQKRQDILDLWVYNTQGYFPDWHNYTPGPGVRYPLTFGWCFKLVPVDPDKVEEATEGENNSLLHPMCQHGMDDPEKEVLMWKFDSHLAYHHMAKEKHPEFYKDC*
41	2005_5	MG823001	102.606	87.4433	89.662	ATGGGTGGCAAGTGTTCAAAACGTAAGACGGGTGGATGGCCTGCTATAAGGGAAAGAATGCAACAAGCTGAGCCAGCAGCAGAAGGGGTGGGAGCAGCATCTCGAGACCTAGAAAGACATGGAGCGATCACAAGTAGCAATATAAATAATGCTGCTTGTACCTGGCTAGAAGCACAAGCACAAGAGGAGGAAGAGGTGGGTTTTCCAGTCAGACCTCAGGTACCTTTAAGGCCAATGACTTACAAGGGAGCTTTTGATCTTAGCTTCTTTTTAAAAGAAAAGGGGGGACTGGAAGGGCTAATTTGGTCTCAGAAAAGACAAGACATCCTTGATTTGTGGGTCTACAACACACAAGGCTACTTCCCTGATTGGCATAACTACACACCAGGGCCAGGGGTC…	MGGKCSKRKTGGWPAIRERMQQAEPAAEGVGAASRDLERHGAITSSNINNAACTWLEAQAQEEEEVGFPVRPQVPLRPMTYKGAFDLSFFLKEKGGLEGLIWSQKRQDILDLWVYNTQGYFPDWHNYTPGPGVRYPLTFGWCFKLVPVDPDKVEEATEGENNSLLHPICQHGMDDPEKEVLVWKFDSHLAYHHMAKEKHPEFYKDC*
42	2006_1	MG822994	99.6085	84.7874	93.8058	ATGGGTGGCAAGTGTTCAAAACGTAAGACGGGTGGATGGCCTGCTATAAGGGAAAGAATGCAACAAGCTGAGCCAGCAGCAGAAGGGGTGGGAGCAGCATCTCGAGACCTAGAAAAACATGGAGCGATCACAAGTAGCAATATAAATAATGCTGCTTGTACCTGGCTAGAAGCACAAGCACAAGAGGAGGAAGAGGTGGGTTTTCCAGTCAGACCTCAGGTACCTTTAAGACCAATGACTTACAAGGGAGCTTTTGATCTTAGCTTCTTTTTAAAAGAAAAGGGGGGACTGGAAGGGCTAATTTGGTCTCAGAAAAGACAAGACATCCTTGATTTGTGGGTCTACAACACACAAGGCTACTTCCCTGATTGGCATAACTACACACCAGGGCCAGGGGTC…	MGGKCSKRKTGGWPAIRERMQQAEPAAEGVGAASRDLEKHGAITSSNINNAACTWLEAQAQEEEEVGFPVRPQVPLRPMTYKGAFDLSFFLKEKGGLEGLIWSQKRQDILDLWVYNTQGYFPDWHNYTPGPGVRYPLTFGWCFKLVPVDPDKVEEATEGENNSLLHPMCQHGMDDPEKEVLVWKFDSHLAYHHMAKEKHPEFYKDC*
43	2006_2	MG822925	97.5407	25.7509	52.2133	ATGGGTGGCAAGTGTTCAAAACGCAAGACGGGTGGATGGCCTGCTATAAGGGAAAGAATGCAACAAGCTGAGACAGCAGCAGAAGGGGTGGGAGCAGCATCTCGAGACCTGGAAAAACATGGGGCAATCACAAGTAGCAATATAAATAATGCTGCTTGTACCTGGCTAGAAGCACAAGCACAAGAGGAGGAAGAGGTGGGTTTTCCAGTCAGACCTCAGGTACCTTTAAGACCAATGACTTACAAGGGAGCATTTGATCTTAGCTTCTTTTTAAAAGAAAAGGGGGGACTGGAAGAGCTAATTTGGTCCCAGAAAAGACAAGACATCCTTGATTTATGGGTCTACAACACACAAGGCTACTTCCCTGATTGGCATAACTACACACCAGGGCCAGGGGTC…	MGGKCSKRKTGGWPAIRERMQQAETAAEGVGAASRDLEKHGAITSSNINNAACTWLEAQAQEEEEVGFPVRPQVPLRPMTYKGAFDLSFFLKEKGGLEELIWSQKRQDILDLWVYNTQGYFPDWHNYTPGPGVRYPLTFGWCFKLVPVDPDKVEEATEGENNSLLHPICQHGMDDPEKEVLVWKFDSHLAYHHMAKEKHPEFYKDC*
44	2006_3	MG823003	100.578	89.6117	86.3292	ATGGGTAGCAAGTGTTCAAAAAGTAAGGCGGGTGGATGGCCTGCTATAAGGGAAAGAATGCAACAAGCTGAGCCAGCAGCAGAAGGGGTGGGAGCAGCATCTCGAGACCTAGAAAGACATGGAGCGATCACAAGTAGCAATGTAAATAATGCTGCTTGTACCTGGCTAGAAGCACAAGCACAAGAGGAGGAAGAGGTGGGTTTTCCAGTCAGACCTCAGGTACCTTTAAGACCAATGACTTACAAGGGAGCTTTTGATCTTAGCTTCTTTTTAAAAGAAAAGGGGGGACTGGAAGGGCTAATTTGGTCCCAGAAAAGACAAGACATCCTTGATTTGTGGGTCTACAACACACAAGGCTACTTCCCTGATTGGCATAACTACACACCAGGGCCAGGGGTC…	MGSKCSKSKAGGWPAIRERMQQAEPAAEGVGAASRDLERHGAITSSNVNNAACTWLEAQAQEEEEVGFPVRPQVPLRPMTYKGAFDLSFFLKEKGGLEGLIWSQKRQDILDLWVYNTQGYFPDWHNYTPGPGVRYPLTFGWCFKLVPVDPDKVEEATEGENNSLLHPICQHGMDDPEKEVLVWKFDSHLAYHHMAKEKHPEFYKDC*
45	2006_4	MG822935	100.088	64.1484	100.85	ATGGGTAGCAAGTGTTCAAAAAGTAAGGCGGGTGGATGGCCTGCTATAAGGGAAAGAATGCAACAAGCTGAGCCAGCAGCAGAAGGGGTGGGAGCAGCATCTCGAGACCTAGAAAGACATGGAGCGATCACAAGTAGCAATGTAAATAATGCTGCTTGTACCTGGCTAGAAGCACAAGCACAAGAGGAGGAAGAGGTGGGTTTTCCAGTCAGACCTCAGGTACCTTTAAGGCCAATGACTTACAAGGGAGCTTTTGATCTTAGCTTCTTTTTAAAAGAAAAGGGGGGGCTGGAAGGGCTAATTTGGTCTCAGAAAAGACAAGACATCCTTGATTTATGGGTCTACAACACACAAGGCTACTTCCCTGATTGGCATAACTACACACCAGGGCCAGGGGTC…	MGSKCSKSKAGGWPAIRERMQQAEPAAEGVGAASRDLERHGAITSSNVNNAACTWLEAQAQEEEEVGFPVRPQVPLRPMTYKGAFDLSFFLKEKGGLEGLIWSQKRQDILDLWVYNTQGYFPDWHNYTPGPGVRYPLTFGWCFKLVPVDPDKVEEATEGENNSLLHPMCQHGMDDPEKEVLVWKFDSHLAYHHMAKEKHPEFYKDC*
46	2006_5	MG822918	101.516	90.4001	102.33	ATGGGTAGCAAGTGTTCAAAAAGTAAGGCGGGTGGATGGCCTGCTATAAGGGAAAGAATGCAACAAGCTGAGCCAGCAGCAGAAGGGGTGGGAGCAGCATCTCGAGACCTAGAAAGACATGGAGCGATCACAAGTAGCAATGTAAATAATGCTGCTTGTACCTGGCTAGAAGCACAAGCACAAGAGGAGGAAGAGGTGGGTTTTCCAGTCAGACCTCAGGTACCTTTAAGGCCAATGACTTACAAGGGAGCTTTTGATCTTAGCTTCTTTTTAAAAGAAAAGGGGGGACTGGAAGGGCTAATTTGGTCTCAGAAAAGACAAGACATCCTTGATTTATGGGTCTACAACACACAAGGCTACTTCCCTGATTGGCATAACTACACACCAGGGCCAGGGGTC…	MGSKCSKSKAGGWPAIRERMQQAEPAAEGVGAASRDLERHGAITSSNVNNAACTWLEAQAQEEEEVGFPVRPQVPLRPMTYKGAFDLSFFLKEKGGLEGLIWSQKRQDILDLWVYNTQGYFPDWHNYTPGPGVRYPLTFGWCFKLVPVDPDKVEEATEGENNSLLHPMCQHGMDDPEKEVLVWKFDSRLAHHHMAREKHPEFYKDC*
47	2007_1	MG822998	101.269	85.5764	98.8625	ATGGGTAGCAAGTGTTCAAAAAGTAAGGCGGGTGGATGGCCTGCTATAAGGGAAAGAATGCAACAAGCTGAGCCAGCAGCAGAAGGGGTGGGAGCAGCATCTCGGGACCTAGAAAAACATGGAGCGATCACAAGTAGCAATATAAATAATGCTGCTTGTACCTGGCTAGAAGCACAAGCACAAGAGGAGGAAGAGGTGGGTTTTCCAGTCAGACCTCAGGTACCGTTAAGGCCAATGACTTACAAGGGAGCTTTTGATCTTAGCTTCTTTTTAAAAGAAAAGGGGGGACTGGAAGGGCTAATTTGGTCCCAGAAAAGACAAGACATCCTTGATTTGTGGGTCTACAACACACAAGGCTACTTCCCTGATTGGCATAACTACACACCAGGGCCAGGGGTC…	MGSKCSKSKAGGWPAIRERMQQAEPAAEGVGAASRDLEKHGAITSSNINNAACTWLEAQAQEEEEVGFPVRPQVPLRPMTYKGAFDLSFFLKEKGGLEGLIWSQKRQDILDLWVYNTQGYFPDWHNYTPGPGVRYPLTFGWCFKLVPVDPDKVEEATEGENNSLLHPMCQHGMDDPEKEVLMWKFDSHLAYHHMAKEKHPEFYKDC*
48	2007_2	MG822920	80.8975	87.3437	22.8067	ATGGGTAGCAAGTGTTCAAAAAGTAAGGTGGGTGGATGGCCTGCTATAAGGGAAAGAATGCAACAAGCTGAGACAGCAGCAGAAGGGGTGGGAGCAGCATCTCGAGACCTAGAAAAACATGAAGCGATCACTAGTAGCAATGTAAATAATGCTGCTTGTACCTGGCTAGAAGCACAAGCACAAGAGGAGGAAGAGGTGGGTTTTCCAGTCAGACCTCAGGTACCTTTAAGGCCAATGACTTACAAGGGAGCTTTTGATCTTAGCTTCTTTTTAAAAGAAAAGGGGGGACTGGAAGGGCTAATTTGGTCTCAGAAAAGACAAGACATCCTTGATTTGTGGGTCTACAACACACAAGGCTACTTCCCTGATTGGCATAACTACACACCAGGGCCAGGGGTC…	MGSKCSKSKVGGWPAIRERMQQAETAAEGVGAASRDLEKHEAITSSNVNNAACTWLEAQAQEEEEVGFPVRPQVPLRPMTYKGAFDLSFFLKEKGGLEGLIWSQKRQDILDLWVYNTQGYFPDWHNYTPGPGVRYPLTFGWCFKLVPVDPDKVEEATEGENNSLLHPICQHGMDDPEKEVLVWKFDSHLAYHHMAKEKHPEFYKDC*
49	2007_3	MG822921	100.168	88.6271	83.242	ATGGGTAGCAAGTGTTCAAAAAGTAAGGTGGGTGGATGGCCTGCTATAAGGGAAAGAATGCAACAAGCTGAGACAGCAGCAGAAGGGGTGGGAGCAGCATCTCGAGACCTAGAAAAACATGGAGCGATCACTAGTAGCAATGTAAATAATGCTGCTTGTACCTGGCTAGAAGCACAAGCACAAGAGGAGGAAGAGGTGGGTTTTCCAGTCAGACCTCAGGTACCTTTAAGGCCAATGACTTACAAGGGAGCTTTTGATCTTAGCTTCTTTTTAAAAGAAAAGGGGGGACTGGAAGGGCTAATTTGGTCTCAGAAAAGACAAGACATCCTTGATTTGTGGGTCTACAACACACAAGGCTACTTCCCTGATTGGCATAACTACACACCAGGGCCAGGGGTC…	MGSKCSKSKVGGWPAIRERMQQAETAAEGVGAASRDLEKHGAITSSNVNNAACTWLEAQAQEEEEVGFPVRPQVPLRPMTYKGAFDLSFFLKEKGGLEGLIWSQKRQDILDLWVYNTQGYFPDWHNYTPGPGVRYPLTFGWCFKLVPVDPDKVEEATEGENNSLLHPICQHGMDDPEKEVLVWKFDSHLAYHHMAKEKHPEFYKDC*
50	2007_4	MG822934	97.2838	48.0133	91.8664	ATGGGTAGCAAGTGTTCAAAAGGTAAGGCGGGTGGATGGCCTGCTATAAGGGAAAGAATGCAACAAGCTGAGCCAGCAGCAGAAGGGGTGGGAGCAGCATCTCGAGACCTAGAAAGACATGGAGCGATCACAAGTAGCAATGTAAATAATGCTGCTTGTACCTGGCTAGAAGCACAAGCACAAGAGGAGGAAGAGGTGGGTTTTCCAGTCAGACCTCAGGTACCTTTAAGGCCAATGACTTACAAGGGAGCTTTTGATCTTAGCTTCTTTTTAAAAGAAAAGGGGGGACTGGAAGGGCTAATTTGGTCTCAGAAAAGACAAGACATCCTTGATTTATGGGTCTACAACACACAAGGCTACTTCCCTGATTGGCATAACTACACACCAGGGCCAGGGGTC…	MGSKCSKGKAGGWPAIRERMQQAEPAAEGVGAASRDLERHGAITSSNVNNAACTWLEAQAQEEEEVGFPVRPQVPLRPMTYKGAFDLSFFLKEKGGLEGLIWSQKRQDILDLWVYNTQGYFPDWHNYTPGPGVRYPLTFGWCFKLVPVDPDKVEEATEGENNSLLHPMCQHGMDDPEKEVLVWKFDSHLAYHHMAKEKHPEFYKDC*
