# Supplementary material for: Longitudinal within-host evolution of HIV Nef-mediated CD4, HLA and SERINC5 downregulation activity: a case study
Source: Retrovirology. 2020 Jan 9;17:3. doi: 10.1186/s12977-019-0510-1 (PMC6953280; doi:10.1186/s12977-019-0510-1)
Supplement: Supplementary file 2 — Additional file 2: Codon-by-codon analysis of Nef sequence with function. [file 12977_2019_510_MOESM2_ESM.xlsx]

## Sheet: CD4 codon-by-codon
amino acid position	amino acid	median CD4 downregulation (with aa)	median CD4 downregulation (without aa)	number of sequences (with aa)	number of sequences (without aa)	Kruskal-wallis p-value	q-value
149	D	100.1	101.75	20	30	0.0014229	0.0245927
149	E	101.75	100.1	30	20	0.0014229	0.0245927
25	P	101.5	99.1	43	7	0.0026368	0.0303821
10	A	101.5	99.6	39	11	0.0072977	0.063065
25	T	97.5	101.3	5	45	0.012158	0.0840532
5	C	100.15	101.6	24	26	0.01873	0.107907
10	T	99.6	101.3	9	41	0.035993	0.135616
125	Q	102.4	100.8	4	46	0.041411	0.135616
5	W	101.5	100.2	25	25	0.041512	0.135616
168	M	100.1	101.3	18	32	0.043156	0.135616
168	I	101.3	100.1	32	18	0.043156	0.135616
48	V	100.15	101.2	6	44	0.052193	0.138781
48	I	101.2	100.15	44	6	0.052193	0.138781
141	L	51.1	100.8	1	49	0.089386	0.155734
141	W	100.8	51.1	49	1	0.089386	0.155734
182	M	100.1	101.1	9	41	0.095415	0.155734
182	V	101.1	100.1	41	9	0.095415	0.155734
41	E	80.9	100.8	1	49	0.10325	0.155734
41	G	100.8	80.9	49	1	0.10325	0.155734
151	D	100.8	102.6	47	3	0.10643	0.155734
151	E	102.6	100.8	3	47	0.10643	0.155734
125	H	100.8	102.05	44	6	0.1134	0.155734
10	V	90.55	100.95	2	48	0.11869	0.155734
180	A	96.7	100.8	1	49	0.11876	0.155734
180	V	100.8	96.7	49	1	0.11876	0.155734
25	S	99.2	100.95	2	48	0.13728	0.155734
23	A	100.8	102.2	46	3	0.14417	0.155734
23	T	102.2	100.8	3	46	0.14417	0.155734
11	G	100.8	102.8	48	2	0.15087	0.155734
114	V	100.8	102.8	48	2	0.15087	0.155734
11	D	102.8	100.8	2	48	0.15087	0.155734
114	A	102.8	100.8	2	48	0.15087	0.155734
99	E	97.5	100.8	1	49	0.15522	0.155734
99	G	100.8	97.5	49	1	0.15522	0.155734
3	S	100.4	101.15	12	38	0.16219	0.155734
3	G	101.15	100.4	38	12	0.16219	0.155734
39	R	100.1	101.1	7	43	0.18859	0.158589
39	K	101.1	100.1	43	7	0.18859	0.158589
8	R	100.1	101.1	11	39	0.18946	0.158589
196	K	100.75	101.7	40	10	0.19007	0.158589
196	R	101.7	100.75	10	40	0.19007	0.158589
8	S	101.1	100.2	35	15	0.19269	0.158589
96	E	98.9	100.8	1	49	0.22501	0.176771
96	G	100.8	98.9	49	1	0.22501	0.176771
5	G	102.6	100.8	1	49	0.26729	0.205321
33	A	100.8	101.1	37	13	0.30871	0.21952
33	V	101.1	100.8	13	37	0.30871	0.21952
188	H	100.8	101.3	30	20	0.34158	0.21952
188	R	101.3	100.8	20	30	0.34158	0.21952
89	F	100.8	102.3	49	1	0.34928	0.21952
163	S	100.8	102.3	49	1	0.34928	0.21952
175	D	100.8	102.3	49	1	0.34928	0.21952
89	L	102.3	100.8	1	49	0.34928	0.21952
163	N	102.3	100.8	1	49	0.34928	0.21952
175	G	102.3	100.8	1	49	0.34928	0.21952
190	V	100	100.8	1	49	0.42526	0.257894
190	A	100.8	100	49	1	0.42526	0.257894
19	R	100.8	101.8	47	3	0.44957	0.263095
19	K	101.8	100.8	3	47	0.44957	0.263095
133	I	100.7	101.2	6	44	0.46428	0.263095
133	V	101.2	100.7	44	6	0.46428	0.263095
204	K	100.8	101.7	48	2	0.51962	0.285107
204	R	101.7	100.8	2	48	0.51962	0.285107
38	E	100.8	101.7	49	1	0.65223	0.346856
38	G	101.7	100.8	1	49	0.65223	0.346856
15	A	100.8	101.5	49	1	0.75504	0.367599
191	Y	100.8	101.5	49	1	0.75504	0.367599
49	D	100.7	100.8	1	49	0.75504	0.367599
49	N	100.8	100.7	49	1	0.75504	0.367599
15	D	101.5	100.8	1	49	0.75504	0.367599
191	H	101.5	100.8	1	49	0.75504	0.367599
125	N	100.9	100.8	2	48	0.84294	0.399652
8	G	101.15	100.8	4	46	0.844	0.399652
116	N	100.8	100.8	45	5	0.93553	0.424106
116	H	100.8	100.8	5	45	0.93553	0.424106
24	E	100.8	100.8	49	1	0.94472	0.424106
24	G	100.8	100.8	1	49	0.94472	0.424106

## Sheet: HLA codon-by-codon
amino acid position	amino acid	median HLA downregulation (with aa)	median HLA downregulation (without aa)	number of sequences (with aa)	number of sequences (without aa)	Kruskal-wallis p-value	q-value
33	V	93	84.7	13	37	0.00071408	0.0269423
33	A	84.7	93	37	13	0.00071408	0.0269423
8	S	88.6	68.5	35	15	0.0019948	0.0501761
149	E	90.35	82.25	30	20	0.0050747	0.0765877
149	D	82.25	90.35	20	30	0.0050747	0.0765877
5	W	91	84.8	25	25	0.0088056	0.0949247
8	G	55.15	87.1	4	46	0.0081363	0.0949247
5	C	82.65	90.85	24	26	0.01008	0.09508
182	V	88.1	74.9	41	9	0.02304	0.144884
168	I	89.1	78.7	32	18	0.022372	0.144884
168	M	78.7	89.1	18	32	0.022372	0.144884
182	M	74.9	88.1	9	41	0.02304	0.144884
196	R	92.15	85.35	10	40	0.053824	0.290112
196	K	85.35	92.15	40	10	0.053824	0.290112
141	W	86.8	0	49	1	0.08954	0.309491
99	G	86.8	25.8	49	1	0.10341	0.309491
11	G	86.85	66.85	48	2	0.11312	0.309491
114	V	86.85	66.85	48	2	0.11312	0.309491
15	D	97.8	86.8	1	49	0.11894	0.309491
25	P	86.8	80.5	43	7	0.10191	0.309491
188	R	90.55	85.05	20	30	0.084899	0.309491
188	H	85.05	90.55	30	20	0.084899	0.309491
8	R	77.7	87.3	11	39	0.091741	0.309491
10	T	77.7	87.3	9	41	0.093089	0.309491
15	A	86.8	97.8	49	1	0.11894	0.309491
11	D	66.85	86.85	2	48	0.11312	0.309491
114	A	66.85	86.85	2	48	0.11312	0.309491
99	E	25.8	86.8	1	49	0.10341	0.309491
141	L	0	86.8	1	49	0.08954	0.309491
96	G	86.8	54.1	49	1	0.15542	0.376981
89	F	86.8	62.3	49	1	0.19983	0.376981
163	S	86.8	62.3	49	1	0.19983	0.376981
175	D	86.8	62.3	49	1	0.19983	0.376981
39	K	86.8	77.7	43	7	0.17507	0.376981
10	A	86.8	84.8	39	11	0.17065	0.376981
39	R	77.7	86.8	7	43	0.17507	0.376981
89	L	62.3	86.8	1	49	0.19983	0.376981
163	N	62.3	86.8	1	49	0.19983	0.376981
175	G	62.3	86.8	1	49	0.19983	0.376981
96	E	54.1	86.8	1	49	0.15542	0.376981
25	T	86.9	86.8	5	45	0.2131	0.392209
38	G	93.6	86.8	1	49	0.25286	0.443742
38	E	86.8	93.6	49	1	0.25286	0.443742
49	D	93	86.8	1	49	0.28276	0.474159
49	N	86.8	93	49	1	0.28276	0.474159
190	A	86.8	71	49	1	0.31497	0.505696
190	V	71	86.8	1	49	0.31497	0.505696
25	S	77	86.85	2	48	0.32208	0.506339
204	R	90	86.8	2	48	0.42827	0.646348
204	K	86.8	90	48	2	0.42827	0.646348
191	H	90.4	86.8	1	49	0.51032	0.735878
19	K	90	86.8	3	47	0.5266	0.735878
19	R	86.8	90	47	3	0.5266	0.735878
191	Y	86.8	90.4	49	1	0.51032	0.735878
125	N	88.9	86.2	2	48	0.56911	0.780822
24	E	86.8	80.7	49	1	0.65239	0.809367
48	V	87.95	86.2	6	44	0.65427	0.809367
3	G	86.8	86.45	38	12	0.64959	0.809367
3	S	86.45	86.8	12	38	0.64959	0.809367
48	I	86.2	87.95	44	6	0.65427	0.809367
24	G	80.7	86.8	1	49	0.65239	0.809367
10	V	87.95	86.2	2	48	0.69205	0.842295
125	Q	76.8	86.85	4	46	0.72063	0.863158
151	D	86.8	85.1	47	3	0.75931	0.881504
151	E	85.1	86.8	3	47	0.75931	0.881504
41	E	87.3	86.8	1	49	0.86246	0.957081
41	G	86.8	87.3	49	1	0.86246	0.957081
5	G	85.1	86.8	1	49	0.86246	0.957081
116	N	86.8	85.1	45	5	0.92271	0.967055
133	I	87.85	86.8	6	44	0.91678	0.967055
133	V	86.8	87.85	44	6	0.91678	0.967055
116	H	85.1	86.8	5	45	0.92271	0.967055
23	A	86.85	80.7	46	3	1	0.980004
125	H	86.85	85.95	44	6	0.96428	0.980004
180	V	86.8	86.8	49	1	1	0.980004
180	A	86.8	86.8	1	49	1	0.980004
23	T	80.7	86.85	3	46	1	0.980004

## Sheet: SERINC5 codon-by-codon
amino acid position	amino acid	median SERINC5 downregulation (with aa)	median SERINC5 downregulation (without aa)	number of sequences (with aa)	number of sequences (without aa)	Kruskal-wallis p-value	q-value
25	P	93.4	52.2	43	7	0.0049507	0.186838
25	T	52.2	93.2	5	45	0.0096715	0.186838
168	M	93.75	89.2	18	32	0.031337	0.196675
168	I	89.2	93.75	32	18	0.031337	0.196675
10	A	93.4	89.7	39	11	0.040418	0.196675
10	V	53	93.05	2	48	0.059903	0.196675
188	R	93.3	90.45	20	30	0.069957	0.196675
188	H	90.45	93.3	30	20	0.069957	0.196675
41	G	92.9	22.8	49	1	0.089517	0.196675
41	E	22.8	92.9	1	49	0.089517	0.196675
141	W	92.9	30.5	49	1	0.10339	0.196675
89	L	102.8	91.9	1	49	0.10339	0.196675
163	N	102.8	91.9	1	49	0.10339	0.196675
175	G	102.8	91.9	1	49	0.10339	0.196675
89	F	91.9	102.8	49	1	0.10339	0.196675
163	S	91.9	102.8	49	1	0.10339	0.196675
175	D	91.9	102.8	49	1	0.10339	0.196675
141	L	30.5	92.9	1	49	0.10339	0.196675
191	H	102.3	91.9	1	49	0.11891	0.196675
191	Y	91.9	102.3	49	1	0.11891	0.196675
8	R	89.7	93.2	11	39	0.12214	0.196675
180	V	92.9	47.1	49	1	0.13621	0.196675
180	A	47.1	92.9	1	49	0.13621	0.196675
11	G	93.05	73.05	48	2	0.13744	0.196675
114	V	93.05	73.05	48	2	0.13744	0.196675
11	D	73.05	93.05	2	48	0.13744	0.196675
114	A	73.05	93.05	2	48	0.13744	0.196675
99	G	92.9	52.2	49	1	0.15539	0.207026
99	E	52.2	92.9	1	49	0.15539	0.207026
8	G	93.85	91.5	4	46	0.16307	0.210017
3	S	93.5	91.5	12	38	0.17646	0.213058
3	G	91.5	93.5	38	12	0.17646	0.213058
38	E	92.9	73.7	49	1	0.1998	0.227048
38	G	73.7	92.9	1	49	0.1998	0.227048
10	T	91.2	92.9	9	41	0.21126	0.232524
196	R	93.05	91.85	10	40	0.2252	0.232524
196	K	91.85	93.05	40	10	0.2252	0.232524
204	K	93.05	84.75	48	2	0.23471	0.232524
204	R	84.75	93.05	2	48	0.23471	0.232524
5	G	98.3	91.9	1	49	0.25282	0.244204
96	G	92.9	78.2	49	1	0.28273	0.26009
96	E	78.2	92.9	1	49	0.28273	0.26009
25	S	66.05	92.4	2	48	0.31009	0.278116
116	H	94	91.9	5	45	0.32392	0.278116
116	N	91.9	94	45	5	0.32392	0.278116
33	V	93.4	91.2	13	37	0.34717	0.285394
33	A	91.2	93.4	37	13	0.34717	0.285394
49	D	94.3	91.9	1	49	0.4668	0.358971
49	N	91.9	94.3	49	1	0.4668	0.358971
133	I	93.9	91.85	6	44	0.49226	0.358971
133	V	91.85	93.9	44	6	0.49226	0.358971
19	R	92.9	76.7	47	3	0.50024	0.358971
19	K	76.7	92.9	3	47	0.50024	0.358971
125	H	93.2	90.5	44	6	0.50171	0.358971
125	Q	87.85	93.05	4	46	0.51973	0.365103
151	E	93.5	91.9	3	47	0.55358	0.375238
151	D	91.9	93.5	47	3	0.55358	0.375238
8	S	92.9	91.9	35	15	0.56755	0.378074
24	E	92.9	87.2	49	1	0.60322	0.388441
24	G	87.2	92.9	1	49	0.60322	0.388441
15	D	93.6	91.9	1	49	0.70307	0.438135
15	A	91.9	93.6	49	1	0.70307	0.438135
182	M	93.2	91.8	9	41	0.74268	0.442005
182	V	91.8	93.2	41	9	0.74268	0.442005
39	K	93.2	91.2	43	7	0.7584	0.442005
39	R	91.2	93.2	7	43	0.7584	0.442005
5	C	92.55	92.35	24	26	0.79318	0.442005
190	V	93.4	91.9	1	49	0.80834	0.442005
190	A	91.9	93.4	49	1	0.80834	0.442005
23	T	93.5	91.85	3	46	0.81856	0.442005
23	A	91.85	93.5	46	3	0.81856	0.442005
125	N	91.5	93.05	2	48	0.82368	0.442005
149	D	92.55	92.35	20	30	0.89757	0.460047
149	E	92.35	92.55	30	20	0.89757	0.460047
48	I	93.05	89.1	44	6	0.90493	0.460047
48	V	89.1	93.05	6	44	0.90493	0.460047
5	W	91.8	93.2	25	25	0.95358	0.478484
